# Supplementary material
Source: publisher figshare collection journal article supplement (https://gsajournals.figshare.com/ndownloader/files/27965706)
Supplement: Supplementary file 1 [file 27965706]

## Sheet: GR4 vs 1021
Table S6. Comparison of ISCompare results using the normal vs the Shift mode (-S).
	New DLIS found with the -S mode
	TP DLIS only detected on the normal mode
Normal Mode			Shift -S 5000	ISCompare FinalResults.csv for -S mode
TP or FP	ISID	ISstart	TP or FP		ISID	ISstart	ISend	Query.ID1	Start1	End1	Query.ID2	Start2	End2	REF.ID1	REF.Start1	REF.End1	REF.ID2	REF.Start2	REF.End2	Description	Observations	IS_Match_Type	QUERY_Flank1.locus_tag	QUERY_Flank1.Product	QUERY_Flank2.locus_tag	QUERY_Flank2.Product	REF_Flank1.locus_tag	REF.Product_Flank1	REF_Flank2.locus_tag	REF.Product_Flank2	Scaffold_Size
TP	ISRm16_IS4Sa_IS4	158695	TP	0	ISRm16_IS4_IS4Sa	158695	159993.0	NC_019845.2	152890.0	153391.0		161382.0	161883.0	NC_003047.1	154194.0	154694.0		163994.0	164494.0	IS only present in ref Strain.	1. DLIS		C770_RS00680	uracil phosphoribosyltransferase	-	-	C770_RS00685	adenosine deaminase	C770_RS00740	CpaF family protein	3654135.0
C	ISRm3_IS256	188748	TP – Multiple ISs	1	ISRm3_IS256	188748	190045.0	NC_019845.2	181636.0	182136.0		188780.0	189280.0	NC_003047.1	184247.0	184747.0		194046.0	194546.0	IS only present in ref Strain.	1. DLIS	Partial IS hit.	C770_RS00815	glucokinase	-	-	C770_RS00825	4-hydroxy-tetrahydrodipicolinate reductase	C770_RS00880	DNA polymerase I	3654135.0
TP*	ISRm5_IS256	190046	TP – Multiple ISs	2	ISRm5_IS256	190046	191047.0	NC_019845.2	182934.0	183434.0		189782.0	190282.0	NC_003047.1	185545.0	186045.0		195048.0	195548.0	IS only present in ref Strain.	1. DLIS	Partial IS hit.	C770_RS00820	ABC transporter ATP-binding protein	-	-	C770_RS00830	2;3-bisphosphoglycerate-dependent phosphoglycerate mutase	C770_RS00880	DNA polymerase I	3654135.0
TP	ISRm16_IS4Sa_IS4	765094	TP	3	ISRm16_IS4_IS4Sa	765094	766392.0	NC_019845.2	729796.0	730297.0		738375.0	738875.0	NC_003047.1	760593.0	761093.0		770393.0	770893.0	IS only present in ref Strain.	1. DLIS		C770_RS03395	carbohydrate ABC transporter permease	-	-	C770_RS03515	iron ABC transporter permease	C770_RS03550	CoA-acylating methylmalonate-semialdehyde dehydrogenase	3654135.0
TP	ISRm2011-2_IS630	825599	TP	4	ISRm2011-2_IS630	825599	826651.0	NC_019845.2	821098.0	821598.0		830652.0	831152.0	NC_003047.1	853137.0	853638.0		861628.0	862135.0	IS only present in query Strain.	1. DLIS		C770_RS03820	LysR family transcriptional regulator	C770_RS03865	NCS1 family nucleobase:cation symporter-1	SM_RS03970	LysR family transcriptional regulator	-	-	3620713.0
TP	ISRm5_IS256	1131212	TP	5	ISRm5_IS256	1131212	1132551.0	NC_019845.2	1126711.0	1127211.0		1136552.0	1137052.0	NC_003047.1	1157944.0	1158443.0		1166513.0	1167013.0	IS only present in query Strain.	1. DLIS		C770_RS05280	autotransporter outer membrane beta-barrel domain-containing protein	C770_RS05300	bifunctional (p)ppGpp synthetase/guanosine-3';5'-bis(diphosphate) 3'-pyrophosphohydrolase	SM_RS05415	autotransporter outer membrane beta-barrel domain-containing protein	-	-	3620713.0
TP	ISRm2011-2_IS630	1150857	TP	6	ISRm2011-2_IS630	1150857	1151909.0	NC_019845.2	1116440.0	1116940.0		1124947.0	1125447.0	NC_003047.1	1146356.0	1146856.0		1155910.0	1156410.0	IS only present in ref Strain.	1. DLIS		C770_RS05215	pyridoxal phosphate-dependent aminotransferase	-	-	C770_RS05365	class I SAM-dependent methyltransferase	C770_RS05415	PhoX family phosphatase	3654135.0
TP	ISRm21_ISAs1	1201499	TP	7	ISRm21_ISAs1	1201499	1202663.0	NC_019845.2	1196998.0	1197498.0		1206664.0	1207164.0	NC_003047.1	1226367.0	1226867.0		1234858.0	1235358.0	IS only present in query Strain.	1. DLIS		C770_RS05605	DNA repair protein RadA	C770_RS05650	HlyD family secretion protein	SM_RS05735	DNA repair protein RadA	-	-	3620713.0
TP	ISRm2011-2_IS630	1271421	TP	8	ISRm2011-2_IS630	1271421	1272473.0	NC_019845.2	1266920.0	1267420.0		1276474.0	1276974.0	NC_003047.1	1295089.0	1295600.0		1303588.0	1304087.0	IS only present in query Strain.	1. DLIS		C770_RS05920	esterase-like activity of phytase family protein	C770_RS05965	chaperonin GroEL	SM_RS06045	esterase-like activity of phytase family protein	-	-	3620713.0
TP	ISRm20_IS481	1356461	TP	9	ISRm20_IS481	1356461	1357721.0	NC_019845.2	1324851.0	1325351.0		1333347.0	1333847.0	NC_003047.1	1351960.0	1352460.0		1361722.0	1362222.0	IS only present in ref Strain.	1. DLIS	Partial IS hit.	C770_RS06220	enoyl-CoA hydratase	-	-	C770_RS06340	NADH-quinone oxidoreductase subunit D	C770_RS06390	NADH-quinone oxidoreductase subunit L	3654135.0
TP	ISRm2011-2_IS630	1439642	TP	10	ISRm2011-2_IS630	1439642	1440694.0	NC_019845.2	1406767.0	1407267.0		1415267.0	1415767.0	NC_003047.1	1435141.0	1435641.0		1444695.0	1445195.0	IS only present in ref Strain.	1. DLIS		C770_RS06600	acetyl-CoA carboxylase biotin carboxylase subunit	-	-	C770_RS06755	DNA-directed RNA polymerase subunit beta	C770_RS06775	30S ribosomal protein S7	3654135.0
TP	ISRm20_IS481	1579084	TP	11	ISRm20_IS481	1579084	1580348.0	NC_019845.2	1546334.0	1546834.0		1554380.0	1554880.0	NC_003047.1	1574583.0	1575083.0		1584349.0	1584849.0	IS only present in ref Strain.	1. DLIS		C770_RS07335	sigma-54-dependent Fis family transcriptional regulator	-	-	C770_RS07480	GNAT family N-acetyltransferase	C770_RS07535	outer membrane protein assembly factor BamA	3654135.0
TP	ISRm5_IS256	1678019	TP	12	ISRm5_IS256	1678019	1679358.0	NC_019845.2	1644567.0	1645067.0		1653063.0	1653563.0	NC_003047.1	1673518.0	1674018.0		1683359.0	1683859.0	IS only present in ref Strain.	1. DLIS	Partial IS hit.	C770_RS07770	glycine cleavage system protein GcvH	-	-	C770_RS07875	glycosyltransferase	C770_RS07915	zinc metallopeptidase	3654135.0
TP*	ISRel10_IS1202_ISNCY	1707290	TP-Multiple ISs	13	ISRel10_ISNCY_IS1202	1707290	1708777.0	NC_019845.2	1702789.0	1703289.0		1712778.0	1713278.0	NC_003047.1	1733085.0	1733590.0		1739620.0	1740120.0	IS only present in query Strain.	1. DLIS	Partial IS hit.	C770_RS08015	GFA family protein	C770_RS08065	pyrophosphatase	SM_RS08145	GFA family protein	-	-	3620713.0
D	ISRm2011-2_IS630	1821180	TP-ltrA	14	ISRm2011-2_IS630	1818792	1819295.0	NC_019845.2	1814291.0	1814791.0		1823296.0	1823796.0	NC_003047.1	1841132.0	1841632.0		1847197.0	1847698.0	IS only present in query Strain.	1. DLIS	Partial IS hit.	C770_RS08595	TRAP transporter substrate-binding protein	C770_RS08640	aminotransferase class V-fold PLP-dependent enzyme	SM_RS08720	TRAP transporter substrate-binding protein	-	-	3620713.0
			TP-ltrA	15	ISRm2011-2_IS630	1821180	1821728.0	NC_019845.2	1816679.0	1817179.0		1825729.0	1826229.0	NC_003047.1	1843520.0	1844026.0		1849629.0	1850131.0	IS only present in query Strain.	1. DLIS	Partial IS hit.	C770_RS08610	NAD(P)-dependent oxidoreductase	C770_RS08650	BCCT family transporter	SM_RS08735	NAD(P)-dependent oxidoreductase	-	-	3620713.0
TP	ISRm5_IS256	1853931	TP	16	ISRm5_IS256	1853931	1855270.0	NC_019845.2	1825528.0	1826029.0		1834021.0	1834521.0	NC_003047.1	1849430.0	1849930.0		1859271.0	1859771.0	IS only present in ref Strain.	1. DLIS		C770_RS08650	BCCT family transporter	-	-	C770_RS08800	SUF system Fe-S cluster assembly protein	C770_RS08845	tyrosine--tRNA ligase	3654135.0
D	ISRm2011-2_IS630	1946848	TP-ltrA	17	ISRm2011-2_IS630	1946848	1947351.0	NC_019845.2	1942347.0	1942847.0		1951352.0	1951852.0	NC_003047.1	1967597.0	1968097.0		1973661.0	1974163.0	IS only present in query Strain.	1. DLIS	Partial IS hit.	C770_RS09220	kinesin	C770_RS09240	cytochrome c1	SM_RS09335	kinesin	-	-	3620713.0
D	ISRm2011-2_IS630	1949236	TP-ltrA	18	ISRm2011-2_IS630	1949236	1949784.0	NC_019845.2	1944735.0	1945235.0		1953785.0	1954285.0	NC_003047.1	1969985.0	1970485.0		1976096.0	1976596.0	IS only present in query Strain.	1. DLIS	Partial IS hit.	C770_RS09220	kinesin	C770_RS09255	ABC transporter ATP-binding protein	SM_RS09335	kinesin	-	-	3620713.0
TP	ISRm3_IS256	2181550	TP	19	ISRm3_IS256	2181550	2182847.0	NC_019845.2	2154721.0	2155221.0		2160953.0	2161453.0	NC_003047.1	2177049.0	2177549.0		2186848.0	2187348.0	IS only present in ref Strain.	1. DLIS	Partial IS hit.	C770_RS10230	DNA packaging protein	-	-	C770_RS10360	endonuclease	C770_RS10400	tetratricopeptide repeat protein	3654135.0
TP	ISRm21_ISAs1	2313362	TP	20	ISRm21_ISAs1	2313362	2314528.0	NC_019845.2	2284174.0	2284674.0		2292666.0	2293166.0	NC_003047.1	2308861.0	2309361.0		2318529.0	2319029.0	IS only present in ref Strain.	1. DLIS	Partial IS hit.	C770_RS10885	UvrD-helicase domain-containing protein	-	-	C770_RS11000	UDP-3-O-acyl-N-acetylglucosamine deacetylase	C770_RS11040	UDP-N-acetylmuramate--L-alanine ligase	3654135.0
D	ISRm16_IS4Sa_IS4	2567133	TP-leuA	21	ISRm16_IS4_IS4Sa	2567133	2568419.0	NC_019845.2	2602783.0	2603283.0		2611241.0	2611746.0	NC_003047.1	2562632.0	2563132.0		2572420.0	2572920.0	IS only present in ref Strain.	1. DLIS		C770_RS12250	RNA polymerase sigma factor	-	-	C770_RS12040	MBL fold metallo-hydrolase	C770_RS12100	peptidoglycan editing factor PgeF	3654135.0
TP	ISRm5_IS256	2602303	TP	22	ISRm5_IS256	2602303	2603642.0	NC_019845.2	2636626.0	2637126.0		2645119.0	2645619.0	NC_003047.1	2597802.0	2598302.0		2607643.0	2608143.0	IS only present in ref Strain.	1. DLIS		C770_RS12395	adenine deaminase	-	-	C770_RS12215	membrane protein	C770_RS12280	ATP-dependent Clp protease proteolytic subunit	3654135.0
TP?	ISRm1_IS2_IS3	2681014	TP	23	ISRm1_IS3_IS2	2681014	2682332.0	NC_019845.2	2714073.0	2714575.0		2722581.0	2723081.0	NC_003047.1	2676513.0	2677013.0		2686333.0	2686833.0	IS only present in ref Strain.	1. DLIS		C770_RS12810	SDR family NAD(P)-dependent oxidoreductase	-	-	C770_RS12605	NAD(P)-dependent alcohol dehydrogenase	C770_RS12650	ABC transporter permease	3654135.0
TP	ISRm17_ISDol1_ISNCY	2802489	TP	24	ISRm17_ISNCY_ISDol1	2802489	2804152.0	NC_019845.2	2834233.0	2834733.0		2842672.0	2843175.0	NC_003047.1	2797988.0	2798488.0		2808153.0	2808653.0	IS only present in ref Strain.	1. DLIS		C770_RS13365	GntR family transcriptional regulator	-	-	C770_RS13205	GntR family transcriptional regulator	C770_RS13245	FAD-binding protein	3654135.0
TP	ISRm5_IS256	2978462	TP	25	ISRm5_IS256	2978462	2979801.0	NC_019845.2	3020103.0	3020603.0		3028593.0	3029093.0	NC_003047.1	2973961.0	2974461.0		2983802.0	2984302.0	IS only present in ref Strain.	1. DLIS		C770_RS14285	transketolase	-	-	C770_RS14090	hypothetical protein	C770_RS14125	phosphoserine transaminase	3654135.0
TP	ISRm17_ISDol1_ISNCY	3042169	TP	26	ISRm17_ISNCY_ISDol1	3042169	3043832.0	NC_019845.2	3083633.0	3084133.0		3092128.0	3092628.0	NC_003047.1	3037668.0	3038168.0		3047833.0	3048333.0	IS only present in ref Strain.	1. DLIS		C770_RS14555	ABC transporter permease	-	-	C770_RS14355	inositol monophosphatase	C770_RS14420	DUF1036 domain-containing protein	3654135.0
C	ISRm5_IS256	3224129	TP-different ISs	27	ISRm5_IS256	3224129	3225156.0	NC_019845.2	3263919.0	3264420.0		3273315.0	3273815.0	NC_003047.1	3219628.0	3220128.0		3229157.0	3229657.0	IS only present in ref Strain.	1. DLIS	Partial IS hit.	C770_RS15365	branched-chain amino acid ABC transporter permease	-	-	C770_RS15170	Lrp/AsnC family transcriptional regulator	C770_RS15205	hypothetical protein	3654135.0
TP	ISRm2011-2_IS630	3258655	TP	28	ISRm2011-2_IS630	3258655	3259707.0	NC_019845.2	3298312.0	3298812.0		3306810.0	3307311.0	NC_003047.1	3254154.0	3254654.0		3263708.0	3264208.0	IS only present in ref Strain.	1. DLIS		C770_RS15475	translocation/assembly module TamB	-	-	-	Intergenic/Pseudo/Repeaed Region	C770_RS15365	branched-chain amino acid ABC transporter permease	3654135.0
TP	ISRm16_IS4Sa_IS4	3378751	TP	29	ISRm16_IS4_IS4Sa	3378751	3380049.0	NC_019845.2	3374250.0	3374750.0		3384050.0	3384550.0	NC_003047.1	3331152.0	3331652.0		3339646.0	3340146.0	IS only present in query Strain.	1. DLIS		C770_RS15830	succinate dehydrogenase iron-sulfur subunit	C770_RS15885	hydroxymethylbilane synthase	SM_RS15715	succinate dehydrogenase iron-sulfur subunit	-	-	3620713.0
D	ISRm2011-2_IS630	3471715	TP-ltrA	30	ISRm2011-2_IS630	3471715	3472218.0	NC_019845.2	3467214.0	3467714.0		3476219.0	3476719.0	NC_003047.1	3504069.0	3504569.0		3510129.0	3510635.0	IS only present in query Strain.	1. DLIS	Partial IS hit.	C770_RS16310	ABC transporter permease	C770_RS16360	thioredoxin family protein	SM_RS16520	ABC transporter permease	-	-	3620713.0
D	ISRm2011-2_IS630	3474103	TP-ltrA	31	ISRm2011-2_IS630	3474103	3474651.0	NC_019845.2	3469602.0	3470102.0		3478652.0	3479152.0	NC_003047.1	3506457.0	3506958.0		3512568.0	3513068.0	IS only present in query Strain.	1. DLIS	Partial IS hit.	C770_RS16315	Bax inhibitor-1/YccA family protein	C770_RS16365	aconitate hydratase AcnA	SM_RS16525	Bax inhibitor-1/YccA family protein	-	-	3620713.0
TP	ISRm21_ISAs1	3552827	TP	32	ISRm21_ISAs1	3552827	3553992.0	NC_019845.2	3514410.0	3514910.0		3522889.0	3523395.0	NC_003047.1	3548326.0	3548826.0		3557993.0	3558493.0	IS only present in ref Strain.	1. DLIS		C770_RS16535	polyhydroxyalkanoate synthesis repressor PhaR	-	-	C770_RS16645	FAD-binding oxidoreductase	C770_RS16685	3-ketoacyl-ACP reductase	3654135.0
TP	ISRm21_ISAs1	3559676	TP	33	ISRm21_ISAs1	3559676	3560841.0	NC_019845.2	3520077.0	3520577.0		3528568.0	3529068.0	NC_003047.1	3555175.0	3555675.0		3564842.0	3565342.0	IS only present in ref Strain.	1. DLIS		C770_RS16570	flavodoxin-dependent (E)-4-hydroxy-3-methylbut-2-enyl-diphosphate synthase	-	-	C770_RS16675	glycerate kinase	C770_RS16715	aldehyde dehydrogenase family protein	3654135.0
TP	ISRm1_IS2_IS3	3566910	TP-ltrA	34	ISRm1_IS3_IS2	3566910	3568228.0	NC_019845.2	3526135.0	3526635.0		3534621.0	3535121.0	NC_003047.1	3562409.0	3562909.0		3572229.0	3572729.0	IS only present in ref Strain.	1. DLIS		C770_RS16595	amino acid ABC transporter ATP-binding protein	-	-	C770_RS16705	sugar ABC transporter permease	C770_RS16745	dipeptidyl carboxypeptidase II	3654135.0
D	ISRm2011-2_IS630	3591717	TP-ltrA	35	ISRm2011-2_IS630	3591717	3592220.0	NC_019845.2	3587216.0	3587716.0		3596221.0	3596721.0	NC_003047.1	3623649.0	3624150.0		3629715.0	3630215.0	IS only present in query Strain.	1. DLIS	Partial IS hit.	C770_RS16800	NAD-glutamate dehydrogenase	C770_RS16825	bifunctional phosphoribosylaminoimidazolecarboxamide formyltransferase/IMP cyclohydrolase	SM_RS17010	NAD-glutamate dehydrogenase	-	-	3620713.0
D	ISRm2011-2_IS630	3594105	TP-ltrA	36	ISRm2011-2_IS630	3594105	3594653.0	NC_019845.2	3589604.0	3590104.0		3598654.0	3599154.0	NC_003047.1	3626037.0	3626537.0		3632147.0	3632648.0	IS only present in query Strain.	1. DLIS	Partial IS hit.	C770_RS16800	NAD-glutamate dehydrogenase	C770_RS16835	MFS transporter	SM_RS17010	NAD-glutamate dehydrogenase	-	-	3620713.0
TP	ISRm2011-2_IS630	12661	TP	37	ISRm2011-2_IS630	12661	13713.0	NC_019848.2	1408585.0	1409085.0		1400085.0	1400585.0	NC_003037.1	8160.0	8660.0		17714.0	18214.0	IS only present in ref Strain.	1. DLIS		-	Contig end.	-	-	C770_RS35515	TetR/AcrR family transcriptional regulator	C770_RS35550	ABC transporter ATP-binding protein	1354226.0
TP	ISRm3_IS256	358752	TP	38	ISRm3_IS256	358752	360049.0	NC_019848.2	1110555.0	1111061.0		1102064.0	1102564.0	NC_003037.1	354251.0	354751.0		364050.0	364550.0	IS only present in ref Strain.	1. DLIS		C770_RS40715	AI-2E family transporter	-	-	C770_RS37125	sugar phosphate isomerase/epimerase	C770_RS37175	iron ABC transporter permease	1354226.0
TP	ISPpa5_IS66	443746	TP	39	ISPpa5_IS66	443746	446552.0	NC_019848.2	439245.0	439745.0		450553.0	451053.0	NC_003037.1	987355.0	987856.0		978868.0	979370.0	IS only present in query Strain.	1. DLIS		C770_RS37505	iron ABC transporter permease	C770_RS37555	amidohydrolase	SM_RS29475	iron ABC transporter permease	-	-	1417907.0
TP	ISRm14_IS66	502087	TP	40	ISRm14_IS66	502087	504781.0	NC_019848.2	497586.0	498086.0		508782.0	509282.0	NC_003037.1	894758.0	895258.0		887774.0	888274.0	IS only present in query Strain.	1. DLIS		C770_RS37765	alkene reductase	C770_RS37825	FAD-dependent oxidoreductase	SM_RS29070	alkene reductase	-	-	1417907.0
TP	ISRm2_IS66	505327	TP	41	ISRm2_IS66	505327	506785.0	NC_019848.2	500826.0	501326.0		510786.0	511286.0	NC_003037.1	891517.0	892018.0		885808.0	886308.0	IS only present in query Strain.	1. DLIS	Partial IS hit.	C770_RS37775	Kef family K(+) transporter	C770_RS37830	AAA family ATPase	SM_RS29055	molecular chaperone	-	-	1417907.0
D	ISRm2011-2_IS630	551087	TP-ltrA	42	ISRm2011-2_IS630	551087	551635.0	NC_019848.2	546586.0	547086.0		555636.0	556136.0	NC_003037.1	849858.0	850358.0		843740.0	844240.0	IS only present in query Strain.	1. DLIS	Partial IS hit.	C770_RS37985	Na(+)/H(+) antiporter subunit D	C770_RS38030	NADH dehydrogenase (quinone) subunit D	SM_RS28900	Na(+)/H(+) antiporter subunit D	-	-	1417907.0
D	ISRm2011-2_IS630	553520	TP-ltrA	43	ISRm2011-2_IS630	553520	554023.0	NC_019848.2	549019.0	549519.0		558024.0	558524.0	NC_003037.1	847424.0	847925.0		841352.0	841852.0	IS only present in query Strain.	1. DLIS	Partial IS hit.	C770_RS37990	NADH-quinone oxidoreductase subunit M	C770_RS38040	NADH-quinone oxidoreductase subunit NuoF	SM_RS28895	NADH-quinone oxidoreductase subunit M	-	-	1417907.0
TP	ISRel16_IS21	584808	TP	44	ISRel16_IS21	584808	587404.0	NC_019848.2	903029.0	903530.0		891605.0	892106.0	NC_003037.1	580307.0	580807.0		591405.0	591905.0	IS only present in ref Strain.	1. DLIS		C770_RS39755	DUF1254 domain-containing protein	-	-	C770_RS38140	c-type cytochrome	C770_RS38185	ABC transporter permease	1354226.0
D	ISRm10-1_IS630	892511	TP-ltrA	45	ISRm10-1_IS630	892511	893014.0	NC_019848.2	888010.0	888510.0		897015.0	897515.0	NC_003037.1	594999.0	595500.0		588922.0	589438.0	IS only present in query Strain.	1. DLIS	Partial IS hit.	C770_RS39680	copper-translocating P-type ATPase	C770_RS39715	tryptophan-rich sensory protein	SM_RS27675	heavy metal translocating P-type ATPase	-	-	1417907.0
D	ISRm10-1_IS630	894899	TP-ltrA	46	ISRm10-1_IS630	894899	895436.0	NC_019848.2	890398.0	890898.0		899437.0	899937.0	NC_003037.1	592612.0	593112.0		583895.0	584395.0	IS only present in query Strain.	1. DLIS	Partial IS hit.	C770_RS39690	phosphoketolase family protein	C770_RS39740	Crp/Fnr family transcriptional regulator	SM_RS27665	phosphoketolase family protein	-	-	1417907.0
D	ISRm1_IS2_IS3	899740	TP-ltrA	47	ISRm1_IS3_IS2	899740	901058.0	NC_019848.2	497103.0	497605.0		493480.0	493980.0	NC_003037.1	895239.0	895739.0		905059.0	905559.0	IS only present in ref Strain.	1. DLIS		C770_RS37765	alkene reductase	-	-	C770_RS39705	helix-turn-helix domain-containing protein	C770_RS39765	TIGR01244 family phosphatase	1354226.0
D	ISRm2011-2_IS630	1022057	TP-ltrA	48	ISRm2011-2_IS630	1022057	1022560.0	NC_019848.2	409658.0	410161.0		403231.0	403731.0	NC_003037.1	1017556.0	1018056.0		1026561.0	1027061.0	IS only present in ref Strain.	1. DLIS	Partial IS hit.	-	Intergenic/Pseudo/Repeaed Region	-	-	C770_RS40275	electron transfer flavoprotein subunit beta/FixA family protein	C770_RS40310	hypothetical protein	1354226.0
D	ISRm2011-2_IS630	1024445	TP-ltrA	49	ISRm2011-2_IS630	1024445	1024993.0	NC_019848.2	400800.0	401304.0		407505.0	408005.0	NC_003037.1	1019944.0	1020444.0		1028994.0	1029494.0	IS only present in ref Strain.	1. DLIS	Partial IS hit.	C770_RS37345	MFS transporter	-	-	C770_RS40285	NAD(P)-binding protein	C770_RS40320	NAD-dependent succinate-semialdehyde dehydrogenase	1354226.0
D	ISRm2011-2_IS630	1070320	TP-ltrA	50	ISRm2011-2_IS630	1070320	1070823.0	NC_019848.2	1065819.0	1066319.0		1074824.0	1075324.0	NC_003037.1	397336.0	397837.0		391267.0	391768.0	IS only present in query Strain.	1. DLIS	Partial IS hit.	C770_RS51840	thermonuclease family protein	C770_RS40565	SDR family oxidoreductase	SM_RS26720	hypothetical protein	-	-	1417907.0
D	ISRm2011-2_IS630	1072708	TP-ltrA	51	ISRm2011-2_IS630	1072708	1073256.0	NC_019848.2	1068207.0	1068707.0		1077257.0	1077757.0	NC_003037.1	394940.0	395448.0		388834.0	389334.0	IS only present in query Strain.	1. DLIS	Partial IS hit.	C770_RS40520	DUF2280 domain-containing protein	C770_RS40570	helix-turn-helix domain-containing protein	SM_RS26690	hypothetical protein	-	-	1417907.0
C	ISRm17_ISDol1_ISNCY	1157941	TP-ltrA	52	ISRm17_ISNCY_ISDol1	1157941	1159591.0	NC_019848.2	1153440.0	1153940.0		1163592.0	1164092.0	NC_003037.1	340515.0	341015.0		334859.0	335360.0	IS only present in query Strain.	1. DLIS	Partial IS hit.	C770_RS40875	hypothetical protein	C770_RS40905	DUF2092 domain-containing protein	SM_RS26415	hypothetical protein	-	-	1417907.0
TP	ISRm5_IS256	1172149	TP	53	ISRm5_IS256	1172149	1173488.0	NC_019848.2	1167648.0	1168148.0		1177489.0	1177989.0	NC_003037.1	330809.0	331307.0		322317.0	322816.0	IS only present in query Strain.	1. DLIS	Partial IS hit.	C770_RS40925	DUF2189 domain-containing protein	C770_RS40975	DUF2092 domain-containing protein	SM_RS26375	DUF2189 domain-containing protein	-	-	1417907.0
TP	ISRm2011-2_IS630	1339781	TP	54	ISRm2011-2_IS630	1339781	1340833.0	NC_019848.2	16706.0	17207.0		8203.0	8710.0	NC_003037.1	1335280.0	1335780.0		1344834.0	1345334.0	IS only present in ref Strain.	1. DLIS	Partial IS hit.	C770_RS35545	ABC transporter permease	-	-	C770_RS41695	malonyl-CoA synthase	C770_RS41740	AI-2E family transporter	1354226.0
TP	ISRm2011-2_IS630	310749	TP	55	ISRm2011-2_IS630	310749	311801.0	NC_019849.2	1438778.0	1439278.0		1430290.0	1430796.0	NC_003078.1	306248.0	306748.0		315802.0	316302.0	IS only present in ref Strain.	1. DLIS		C770_RS48550	N-acetylneuraminate lyase	-	-	C770_RS43460	dihydrodipicolinate synthase family protein	C770_RS43510	glycosyltransferase	1683333.0
TP	ISRm21_ISAs1	434687	TP	56	ISRm21_ISAs1	434687	435852.0	NC_019849.2	1323724.0	1324225.0		1315235.0	1315735.0	NC_003078.1	430186.0	430686.0		439853.0	440353.0	IS only present in ref Strain.	1. DLIS		C770_RS48020	sn-glycerol-3-phosphate ABC transporter substrate-binding protein UgpB	-	-	C770_RS44075	hypothetical protein	C770_RS44120	FixH family protein	1683333.0
TP*	ISRm5_IS256	501946	TP – 2 Consecutive ISs	57	ISRm5_IS256	501946	503285.0	NC_019849.2	497445.0	497945.0		507286.0	507786.0	NC_003078.1	1233743.0	1234247.0		1225714.0	1226214.0	IS only present in query Strain.	1. DLIS	Partial IS hit.	C770_RS44370	hypothetical protein	C770_RS44410	SidA/IucD/PvdA family monooxygenase	SM_RS22610	nitrate reductase	-	-	1701381.0
TP	ISRm14_IS66	568241	TP	58	ISRm14_IS66	568241	570934.0	NC_019849.2	1197691.0	1198191.0		1189199.0	1189698.0	NC_003078.1	563740.0	564240.0		574935.0	575435.0	IS only present in ref Strain.	1. DLIS		-	Intergenic/Pseudo/Repeaed Region	-	-	C770_RS44655	exopolysaccharide production protein ExoZ	C770_RS44700	PAS domain S-box protein	1683333.0
D	ISRm17_ISDol1_ISNCY	643810	TP-ltrA	59	ISRm17_ISNCY_ISDol1	643810	645460.0	NC_019849.2	639309.0	639809.0		649461.0	649961.0	NC_003078.1	1093430.0	1093930.0		1086826.0	1087339.0	IS only present in query Strain.	1. DLIS	Partial IS hit.	C770_RS45000	transporter monovalent cation:proton antiporter-2 (CPA2) family	C770_RS45045	autotransporter	SM_RS22005	potassium transporter	-	-	1701381.0
C	IS66_IS66	1059802	TP-ltrA in 1021 and an IS in GR4	60	IS66_IS66	1059802	1061937.0	NC_019849.2	1055301.0	1055801.0		1065938.0	1066438.0	NC_003078.1	683730.0	684230.0		673167.0	673671.0	IS only present in query Strain.	1. DLIS	Partial IS hit.	C770_RS46740	nucleotide sugar dehydrogenase	C770_RS46785	DUF4334 domain-containing protein	SM_RS20275	lipopolysaccharide biosynthesis protein	-	-	1701381.0
TP	ISRm14_IS66	1183943	TP	61	ISRm14_IS66	1183943	1186646.0	NC_019849.2	1179442.0	1179942.0		1190647.0	1191147.0	NC_003078.1	581994.0	582494.0		573486.0	573987.0	IS only present in query Strain.	1. DLIS		C770_RS47300	YbaN family protein	C770_RS47385	hypothetical protein	SM_RS19830	YbaN family protein	-	-	1701381.0
D	ISRm10-1_IS630	1251157	TP-On normal mode, incorrectly detected IS and discarded	62	ISRm10-1_IS630	1251157	1251700.0	NC_019849.2	1246656.0	1247156.0		1255701.0	1256201.0	NC_003078.1	515329.0	515829.0		507329.0	507828.0	IS only present in query Strain.	1. DLIS	Partial IS hit.	C770_RS47650	GMC family oxidoreductase	C770_RS47705	DUF899 family protein	SM_RS19510	GMC family oxidoreductase	-	-	1701381.0
TP	ISRm17_ISDol1_ISNCY	1466307	TP	63	ISRm17_ISNCY_ISDol1	1466307	1466962.0	NC_019849.2	279104.0	279604.0		270405.0	270905.0	NC_003078.1	1461806.0	1462306.0		1470963.0	1471463.0	IS only present in ref Strain.	1. DLIS	Partial IS hit.	C770_RS43330	carbohydrate ABC transporter substrate-binding protein	-	-	C770_RS48650	CMD domain-containing protein	C770_RS48705	DUF521 domain-containing protein	1683333.0
TP	ISRm16_IS4Sa_IS4	1557292	TP	64	ISRm16_IS4_IS4Sa	1557292	1558590.0	NC_019849.2	188557.0	189057.0		180065.0	180565.0	NC_003078.1	1552791.0	1553291.0		1562591.0	1563091.0	IS only present in ref Strain.	1. DLIS		C770_RS42910	carbon-phosphorus lyase complex subunit PhnI	-	-	C770_RS49135	methanol/ethanol family PQQ-dependent dehydrogenase	C770_RS49180	hybrid sensor histidine kinase/response regulator	1683333.0
D	ISRm2011-2_IS630	1576501	TP-ltrA	65	ISRm2011-2_IS630	1576501	1577049.0	NC_019849.2	170650.0	171150.0		165748.0	166249.0	NC_003078.1	1572000.0	1572500.0		1581050.0	1581550.0	IS only present in ref Strain.	1. DLIS	Partial IS hit.	C770_RS42840	adenylate/guanylate cyclase domain-containing protein	-	-	C770_RS49230	iron ABC transporter permease	C770_RS49255	Tn3 family transposase	1683333.0
D	ISRm17_ISDol1_ISNCY	1680513	TP-2 ltrA	66	ISRm17_ISNCY_ISDol1	1680513	1682150.0	NC_019849.2	1676012.0	1676512.0		1686151.0	1686651.0	NC_003078.1	75851.0	76351.0		69811.0	70311.0	IS only present in query Strain.	1. DLIS	Partial IS hit.	C770_RS49680	sodium:alanine symporter family protein	C770_RS49740	class I SAM-dependent methyltransferase	SM_RS17460	sodium:alanine symporter family protein	-	-	1701381.0
D	ISRel16_IS21	178912	C	67	ISRel16_IS21	178912	180561.0	NC_019847.2	174411.0	174911.0		184562.0	185062.0	NC_003037.1	584808.0	585062.0				IS only present in query Strain.	2. Verify manually, possible false positive caused by consecutive ISs.	Partial IS hit.	C770_RS35230	IS66 family transposase	C770_RS35285	IS21 family transposase	SM_RS27630	IS21 family transposase	-	-	225725.0
D	ISRel16_IS21	183874	C	68	ISRel16_IS21	183874	184817.0	NC_019847.2	179373.0	179873.0		188818.0	189318.0							IS only present in query Strain.	2. Verify manually, possible false positive caused by consecutive ISs.	Partial IS hit.	C770_RS35260	ATP-binding protein	C770_RS35310	Tn3 family transposase	-	-	-	-	225725.0
D	ISRm14_IS66	201054	C	69	ISRm14_IS66	201054	203748.0	NC_019847.2	196553.0	197053.0		207749.0	208249.0	NC_003037.1	1222887.0	1223194.0				IS only present in query Strain.	2. Verify manually, possible false positive caused by consecutive ISs.		C770_RS35345	hypothetical protein	C770_RS35390	hypothetical protein	SM_RS30610	hypothetical protein	-	-	225725.0
D	ISRel16_IS21	423315	C	70	ISRel16_IS21	423315	424973.0	NC_019848.2	1039534.0	1039779.0				NC_003037.1	418814.0	419314.0		428974.0	429474.0	IS only present in ref Strain.	2. Verify manually, possible false positive caused by consecutive ISs.	Partial IS hit.	C770_RS40375	GntR family transcriptional regulator	-	-	C770_RS37410	alpha/beta hydrolase	C770_RS37460	ABC transporter substrate-binding protein	1354226.0
D	ISRel16_IS21	428286	C	71	ISRel16_IS21	428286	429228.0							NC_003037.1	423785.0	424285.0		433229.0	433729.0	IS only present in ref Strain.	2. Verify manually, possible false positive caused by consecutive ISs.	Partial IS hit.	-	-	-	-	SM_RS26850	ATP-binding protein	SM_RS26905	LLM class flavin-dependent oxidoreductase	1354226.0
D	ISSme3_IS66	3393655	C	72	ISSme3_IS66	3393655	3395243.0							NC_003047.1	3389154.0	3389654.0		3399244.0	3399744.0	IS only present in ref Strain.	2. Verify manually, possible false positive caused by consecutive ISs.	Partial IS hit.	-	-	-	-	SM_RS16005	ABC transporter permease	-	Intergenic/Pseudo/Repeaed Region	3654135.0
C	ISPpa5_IS66	3407923	C	73	ISPpa5_IS66	3407923	3409517.0							NC_003047.1	3403422.0	3403922.0		3413518.0	3414018.0	IS only present in ref Strain.	2. Verify manually, possible false positive caused by consecutive ISs.	Partial IS hit.	-	-	-	-	SM_RS16070	tyrosinase family protein	SM_RS16110	IS66 family transposase	3654135.0
D	ISRm1_IS2_IS3	3410552	C	74	ISRm1_IS3_IS2	3410552	3411870.0							NC_003047.1	3406051.0	3406551.0		3415871.0	3416371.0	IS only present in ref Strain.	2. Verify manually, possible false positive caused by consecutive ISs.		-	-	-	-	-	Intergenic/Pseudo/Repeaed Region	SM_RS16120	IS66 family insertion sequence hypothetical protein	3654135.0
			C	75	ISPye9_IS66	3413609	3414904.0							NC_003047.1	3409108.0	3409608.0		3418905.0	3419405.0	IS only present in ref Strain.	2. Verify manually, possible false positive caused by consecutive ISs.	Partial IS hit.	-	-	-	-	SM_RS16085	IS66 family transposase	SM_RS16130	DNA or RNA helicase	3654135.0
C	ISKpn11_IS150_IS3	3416127	C	76	ISKpn11_IS3_IS150	3416127	3416600.0							NC_003047.1	3411626.0	3412126.0		3420601.0	3421101.0	IS only present in ref Strain.	2. Verify manually, possible false positive caused by consecutive ISs.	Partial IS hit.	-	-	-	-	SM_RS16100	IS3-like element ISRm1 family transposase	SM_RS16135	DEAD/DEAH box helicase	3654135.0
			C	77	ISRle2_IS30	1704853	1705315.0	NC_019845.2	1700352.0	1700852.0		1709316.0	1709816.0	NC_003047.1	1730647.0	1731151.0		1736158.0	1736658.0	IS only present in query Strain.	3. Verify manually, Possible false positive produced by consecutive IS [2 RAFs found, only one with an IS].	Partial IS hit.	C770_RS08000	MFS transporter	C770_RS08050	MBL fold metallo-hydrolase	SM_RS08130	MFS transporter	-	-	3620713.0
TP*	ISRel26_IS1202_ISNCY	1705444	TP*	78	ISRel26_ISNCY_IS1202	1705444	1706994.0	NC_019845.2	1700943.0	1701443.0		1710995.0	1711495.0	NC_003047.1	1731239.0	1731740.0		1737837.0	1738337.0	IS only present in query Strain.	3. Verify manually, Possible false positive produced by consecutive IS [2 RAFs found, only one with an IS].	Partial IS hit.	C770_RS08005	DUF1127 domain-containing protein	C770_RS08060	methionine--tRNA ligase	SM_RS08135	DUF1127 domain-containing protein	-	-	3620713.0
TP	ISRm1_IS2_IS3	568052	Is a TP, but the shift mode fails. Match on other genomic region.	79	ISRm1_IS3_IS2	568052	569369.0	NC_019846.2	163258.0	163758.0				NC_003037.1	563551.0	564051.0		573370.0	573870.0	IS only present in ref Strain.	5. Discarded for analysis. There were multiple blastn hits, and left and right pairs could not be determined.		-	Intergenic/Pseudo/Repeaed Region	-	-	-	Intergenic/Pseudo/Repeaed Region	-	Contig end.	1354226.0
D	ISRtr1_IS256	44667	D	80	ISRtr1_IS256	44667	45913.0	NC_019847.2	40166.0	40666.0		49914.0	50414.0							IS only present in query Strain.	5. Discarded for analysis. There were multiple blastn hits, and left and right pairs could not be determined.	Partial IS hit.	C770_RS34505	IS66 family transposase	C770_RS34545	IS21 family transposase	-	-	-	-	225725.0
D	ISRtr1_IS256	61976	D	81	ISRtr1_IS256	61976	62782.0	NC_019847.2	57475.0	57975.0		66783.0	67283.0							IS only present in query Strain.	5. Discarded for analysis. There were multiple blastn hits, and left and right pairs could not be determined.	Partial IS hit.	C770_RS34595	LLM class flavin-dependent oxidoreductase	C770_RS34640	NAD-dependent formate dehydrogenase	-	-	-	-	225725.0
D	ISRm12_IS5_IS5	146772	D	82	ISRm12_IS5_IS5	146772	148253.0	NC_019847.2	142271.0	142771.0		152254.0	152754.0							IS only present in query Strain.	5. Discarded for analysis. There were multiple blastn hits, and left and right pairs could not be determined.		C770_RS35065	dihydrodipicolinate synthase family protein	C770_RS35110	IS256-like element ISRm3 family transposase	-	-	-	-	225725.0
D	ISRm1_IS2_IS3	175587	D	83	ISRm1_IS3_IS2	175587	176526.0	NC_019847.2	171086.0	171586.0		180527.0	181027.0							IS only present in query Strain.	5. Discarded for analysis. There were multiple blastn hits, and left and right pairs could not be determined.	Partial IS hit.	C770_RS35220	EscT/YscT/HrcT family type III secretion system export apparatus protein	C770_RS35265	IS21 family transposase	-	-	-	-	225725.0
D	ISPpa5_IS66	185978	D	84	ISPpa5_IS66	185978	188170.0	NC_019847.2	181477.0	181977.0		192171.0	192671.0							IS only present in query Strain.	5. Discarded for analysis. There were multiple blastn hits, and left and right pairs could not be determined.	Partial IS hit.	C770_RS35270	helix-turn-helix domain containing protein	C770_RS35320	class I SAM-dependent methyltransferase	-	-	-	-	225725.0
D	ISRm5_IS256	316884	D	85	ISRm5_IS256	316884	317375.0	NC_019848.2	312383.0	312883.0		321376.0	321876.0							IS only present in query Strain.	5. Discarded for analysis. There were multiple blastn hits, and left and right pairs could not be determined.	Partial IS hit.	C770_RS36920	NAD(P)H:quinone oxidoreductase	C770_RS36970	xanthine dehydrogenase family protein molybdopterin-binding subunit	-	-	-	-	1417907.0
D	ISRm5_IS256	494338	D	86	ISRm5_IS256	494338	495677.0	NC_019848.2	489837.0	490337.0		499678.0	500178.0	NC_003037.1	908724.0	909228.0				IS only present in query Strain.	5. Discarded for analysis. There were multiple blastn hits, and left and right pairs could not be determined.		C770_RS37730	LysR family transcriptional regulator	C770_RS37775	Kef family K(+) transporter	SM_RS29140	LysR family transcriptional regulator	-	-	1417907.0
D	ISRm2011-2_IS630	659036	D	87	ISRm2011-2_IS630	659036	659539.0	NC_019848.2	654535.0	655035.0		663540.0	664040.0							IS only present in query Strain.	5. Discarded for analysis. There were multiple blastn hits, and left and right pairs could not be determined.	Partial IS hit.	C770_RS38500	MBL fold metallo-hydrolase	C770_RS38540	sugar phosphate isomerase/epimerase	-	-	-	-	1417907.0
D	ISRm2011-2_IS630	661424	D	88	ISRm2011-2_IS630	661424	661972.0	NC_019848.2	656923.0	657423.0		665973.0	666473.0							IS only present in query Strain.	5. Discarded for analysis. There were multiple blastn hits, and left and right pairs could not be determined.	Partial IS hit.	C770_RS38510	VOC family protein	C770_RS38550	FadR family transcriptional regulator	-	-	-	-	1417907.0
D	ISRm2011-2_IS630	771917	D	89	ISRm2011-2_IS630	771917	772420.0	NC_019848.2	767416.0	767916.0		776421.0	776921.0							IS only present in query Strain.	5. Discarded for analysis. There were multiple blastn hits, and left and right pairs could not be determined.	Partial IS hit.	C770_RS39085	LysR family transcriptional regulator	C770_RS39130	xanthine dehydrogenase family protein molybdopterin-binding subunit	-	-	-	-	1417907.0
D	ISNha8_IS5	772795	D	90	ISNha8_IS5	772795	773964.0	NC_019848.2	768294.0	768794.0		777965.0	778465.0							IS only present in query Strain.	5. Discarded for analysis. There were multiple blastn hits, and left and right pairs could not be determined.	Partial IS hit.	C770_RS51545	hypothetical protein	C770_RS39140	c-type cytochrome	-	-	-	-	1417907.0
D	ISRm2_IS66	910937	D	91	ISRm2_IS66	910937	911881.0	NC_019848.2	906436.0	906936.0		915882.0	916382.0							IS only present in query Strain.	5. Discarded for analysis. There were multiple blastn hits, and left and right pairs could not be determined.	Partial IS hit.	C770_RS39775	YeeE/YedE family protein	C770_RS39820	IS30 family transposase	-	-	-	-	1417907.0
D	ISRel10_IS1202_ISNCY	913321	D	92	ISRel10_ISNCY_IS1202	913321	914808.0	NC_019848.2	908820.0	909320.0		918809.0	919309.0	NC_003037.1	555770.0	556141.0				IS only present in query Strain.	5. Discarded for analysis. There were multiple blastn hits, and left and right pairs could not be determined.	Partial IS hit.	-	Intergenic/Pseudo/Repeaed Region	C770_RS39840	IS66 family transposase	-	Intergenic/Pseudo/Repeaed Region	-	-	1417907.0
TP	ISRm14_IS66	917718	Is a TP, but the shift mode fails. Match on other genomic region.	93	ISRm14_IS66	917718	920412.0	NC_019848.2	913217.0	913717.0		924413.0	924913.0	NC_003037.1	544624.0	544895.0				IS only present in query Strain.	5. Discarded for analysis. There were multiple blastn hits, and left and right pairs could not be determined.		C770_RS39815	ISNCY family transposase	C770_RS39880	SDR family oxidoreductase	-	Intergenic/Pseudo/Repeaed Region	-	-	1417907.0
D	ISRm31_IS701	1124147	D	94	ISRle2_IS30	1118689	1119224.0	NC_019848.2	1114188.0	1114688.0		1123225.0	1123725.0							IS only present in query Strain.	5. Discarded for analysis. There were multiple blastn hits, and left and right pairs could not be determined.	Partial IS hit.	C770_RS40730	helix-turn-helix domain-containing protein	C770_RS40780	hypothetical protein	-	-	-	-	1417907.0
C	ISRm17_ISDol1_ISNCY	1156998	D	95	ISRm17_ISNCY_ISDol1	1156998	1157936.0	NC_019848.2	1152497.0	1152997.0		1161937.0	1162437.0	NC_003037.1	336514.0	337022.0				IS only present in query Strain.	5. Discarded for analysis. There were multiple blastn hits, and left and right pairs could not be determined.	Partial IS hit.	C770_RS40870	CBS domain-containing protein	C770_RS40900	aquaporin Z	SM_RS26405	aquaporin Z	-	-	1417907.0
TP	ISRm5_IS256	70327	Is a TP, but the shift mode fails. Match on other genomic region.	96	ISRm5_IS256	70327	71666.0	NC_019849.2	1694192.0	1694314.0				NC_003078.1	65826.0	66326.0		75667.0	76167.0	IS only present in ref Strain.	5. Discarded for analysis. There were multiple blastn hits, and left and right pairs could not be determined.		-	Contig end.	-	-	C770_RS42380	ABC transporter substrate-binding protein	C770_RS42430	phenylacetate-CoA oxygenase subunit PaaJ	1683333.0
D	ISRm10-1_IS630	674489	D	97	ISRm10-1_IS630	674489	675026.0	NC_019849.2	1080432.0	1080684.0				NC_003078.1	669988.0	670488.0		679027.0	679527.0	IS only present in ref Strain.	5. Discarded for analysis. There were multiple blastn hits, and left and right pairs could not be determined.	Partial IS hit.	C770_RS46865	hypothetical protein	-	-	C770_RS45095	2-aminoethylphosphonate--pyruvate transaminase	C770_RS45125	YeiH family putative sulfate export transporter	1683333.0
D	ISRm2_IS66	1075014	D	98	ISRm2_IS66	1075014	1077605.0	NC_019849.2	1070513.0	1071013.0		1081606.0	1082106.0							IS only present in query Strain.	5. Discarded for analysis. There were multiple blastn hits, and left and right pairs could not be determined.		C770_RS46815	DUF1194 domain-containing protein	-	Intergenic/Pseudo/Repeaed Region	-	-	-	-	1701381.0
D	ISRm4-1_IS1031_IS5	1148066	D	99	ISRm4-1_IS5_IS1031	1148066	1148998.0	NC_019849.2	1143565.0	1144065.0		1152999.0	1153499.0							IS only present in query Strain.	5. Discarded for analysis. There were multiple blastn hits, and left and right pairs could not be determined.		C770_RS47135	hypothetical protein	C770_RS47180	FAD-dependent oxidoreductase	-	-	-	-	1701381.0
D	ISRm1_IS2_IS3	1325820	D	100	ISRm1_IS3_IS2	1325820	1327138.0	NC_019849.2	409930.0	410432.0				NC_003078.1	1321319.0	1321819.0		1331139.0	1331639.0	IS only present in ref Strain.	5. Discarded for analysis. There were multiple blastn hits, and left and right pairs could not be determined.		C770_RS49855	hypothetical protein	-	-	C770_RS48005	sn-glycerol-3-phosphate import ATP-binding protein UgpC	C770_RS48055	c-type cytochrome	1683333.0
D	ISRm3_IS256	207549	D	101	ISRm3_IS256	207549	208846.0							NC_003037.1	203048.0	203548.0		212847.0	213347.0	IS only present in ref Strain.	5. Discarded for analysis. There were multiple blastn hits, and left and right pairs could not be determined.		-	-	-	-	SM_RS25765	amidohydrolase	SM_RS25800	extracellular solute-binding protein	1354226.0
D	ISRm1_IS2_IS3	236849	D	102	ISRm1_IS3_IS2	236849	238167.0							NC_003037.1	232348.0	232848.0		242168.0	242668.0	IS only present in ref Strain.	5. Discarded for analysis. There were multiple blastn hits, and left and right pairs could not be determined.		-	-	-	-	SM_RS25900	nucleotidyl transferase AbiEii/AbiGii toxin family protein	-	Intergenic/Pseudo/Repeaed Region	1354226.0
D	ISRm3_IS256	245058	D	103	ISRm3_IS256	245058	246355.0							NC_003037.1	240557.0	241057.0		250356.0	250856.0	IS only present in ref Strain.	5. Discarded for analysis. There were multiple blastn hits, and left and right pairs could not be determined.		-	-	-	-	SM_RS25950	hypothetical protein	SM_RS25980	AAA family ATPase	1354226.0
			D	104	ISRle2_IS30	348393	349277.0							NC_003037.1	343892.0	344392.0		353278.0	353778.0	IS only present in ref Strain.	5. Discarded for analysis. There were multiple blastn hits, and left and right pairs could not be determined.	Partial IS hit.	-	-	-	-	SM_RS26440	BA14K family protein	SM_RS26505	hypothetical protein	1354226.0
D	ISRm3_IS256	543791	D	105	ISRm3_IS256	543791	544622.0							NC_003037.1	539290.0	539790.0		548623.0	549123.0	IS only present in ref Strain.	5. Discarded for analysis. There were multiple blastn hits, and left and right pairs could not be determined.	Partial IS hit.	-	-	-	-	SM_RS27350	response regulator transcription factor	-	Intergenic/Pseudo/Repeaed Region	1354226.0
			D	106	ISRle2_IS30	545088	546009.0							NC_003037.1	540587.0	541087.0		550010.0	550510.0	IS only present in ref Strain.	5. Discarded for analysis. There were multiple blastn hits, and left and right pairs could not be determined.	Partial IS hit.	-	-	-	-	SM_RS27360	HEPN domain-containing protein	SM_RS27425	transcriptional regulator	1354226.0
D	ISRm5_IS256	551238	D	107	ISRm5_IS256	551238	552577.0							NC_003037.1	546737.0	547237.0		556578.0	557078.0	IS only present in ref Strain.	5. Discarded for analysis. There were multiple blastn hits, and left and right pairs could not be determined.	Partial IS hit.	-	-	-	-	SM_RS27395	type II toxin-antitoxin system VapC family toxin	SM_RS27450	glutaredoxin	1354226.0
D	ISRtr1_IS256	553136	D	108	ISRtr1_IS256	553136	553991.0							NC_003037.1	548635.0	549135.0		557992.0	558492.0	IS only present in ref Strain.	5. Discarded for analysis. There were multiple blastn hits, and left and right pairs could not be determined.	Partial IS hit.	-	-	-	-	-	Intergenic/Pseudo/Repeaed Region	SM_RS27455	DUF4396 domain-containing protein	1354226.0
D	ISHar1_IS150_IS3	617510	D	109	ISBcen16_IS3_IS150	617530	618071.0							NC_003078.1	613029.0	613529.0		622072.0	622572.0	IS only present in ref Strain.	5. Discarded for analysis. There were multiple blastn hits, and left and right pairs could not be determined.	Partial IS hit.	-	-	-	-	SM_RS19970	glycosyltransferase	SM_RS20005	KpsF/GutQ family sugar-phosphate isomerase	1683333.0
D	ISNwi5_IS481	642390	D	110	ISNwi5_IS481	642390	643369.0							NC_003037.1	637889.0	638389.0		647370.0	647870.0	IS only present in ref Strain.	5. Discarded for analysis. There were multiple blastn hits, and left and right pairs could not be determined.		-	-	-	-	SM_RS27860	heavy metal translocating P-type ATPase	SM_RS27895	regulatory protein NosR	1354226.0
D	ISRm1_IS2_IS3	672361	D	111	ISRm1_IS3_IS2	672361	673463.0							NC_003047.1	667860.0	668360.0		677464.0	677964.0	IS only present in ref Strain.	5. Discarded for analysis. There were multiple blastn hits, and left and right pairs could not be determined.	Partial IS hit.	-	-	-	-	SM_RS03045	restriction endonuclease subunit S	SM_RS03095	UDP-N-acetylglucosamine 1-carboxyvinyltransferase	3654135.0
D	ISRm10-1_IS630	676911	D	112	ISRm10-1_IS630	676911	677414.0							NC_003078.1	672410.0	672910.0		681415.0	681915.0	IS only present in ref Strain.	5. Discarded for analysis. There were multiple blastn hits, and left and right pairs could not be determined.	Partial IS hit.	-	-	-	-	SM_RS20235	hypothetical protein	SM_RS20270	hypothetical protein	1683333.0
D	ISRm14_IS66	722335	D	113	ISRm3_IS256	743307	744604.0							NC_003037.1	738806.0	739306.0		748605.0	749105.0	IS only present in ref Strain.	5. Discarded for analysis. There were multiple blastn hits, and left and right pairs could not be determined.		-	-	-	-	SM_RS28370	FadR family transcriptional regulator	SM_RS28415	sugar ABC transporter permease	1354226.0
TP	ISRm1_IS2_IS3	799141	Is a TP, but the shift mode fails. Match on other genomic region.	114	ISRm1_IS3_IS2	799141	800459.0							NC_003078.1	794640.0	795140.0		804460.0	804960.0	IS only present in ref Strain.	5. Discarded for analysis. There were multiple blastn hits, and left and right pairs could not be determined.		-	-	-	-	SM_RS20765	glycosyltransferase	SM_RS20800	pectate lyase	1683333.0
D	ISPpa5_IS66	897332	D	115	ISPpa5_IS66	897332	899601.0							NC_003037.1	892831.0	893331.0		903602.0	904102.0	IS only present in ref Strain.	5. Discarded for analysis. There were multiple blastn hits, and left and right pairs could not be determined.	Partial IS hit.	-	-	-	-	SM_RS29060	Kef family K(+) transporter	SM_RS29110	tyrosine-type recombinase/integrase	1354226.0
D	ISRm17_ISDol1_ISNCY	911649	D	116	ISRm17_ISNCY_ISDol1	911649	913315.0							NC_003037.1	907148.0	907648.0		917316.0	917816.0	IS only present in ref Strain.	5. Discarded for analysis. There were multiple blastn hits, and left and right pairs could not be determined.		-	-	-	-	SM_RS29130	SDR family oxidoreductase	SM_RS29180	ABC transporter ATP-binding protein	1354226.0
D	ISNha8_IS5	1011559	D	117	ISNha8_IS5	1011559	1012013.0							NC_003037.1	1007058.0	1007558.0		1016014.0	1016514.0	IS only present in ref Strain.	5. Discarded for analysis. There were multiple blastn hits, and left and right pairs could not be determined.	Partial IS hit.	-	-	-	-	SM_RS29580	alpha/beta hydrolase	SM_RS29625	ATP-dependent DNA ligase	1354226.0
D	ISMtsp13_IS256	1067823	D	118	ISMtsp13_IS256	1067823	1068450.0							NC_003037.1	1063322.0	1063822.0		1072451.0	1072951.0	IS only present in ref Strain.	5. Discarded for analysis. There were multiple blastn hits, and left and right pairs could not be determined.	Partial IS hit.	-	-	-	-	SM_RS29830	ornithine cyclodeaminase family protein	SM_RS29865	efflux RND transporter permease subunit	1354226.0
D	ISRm2011-2_IS630	1574113	D	119	ISRm2011-2_IS630	1574113	1574616.0							NC_003078.1	1569612.0	1570112.0		1578617.0	1579117.0	IS only present in ref Strain.	5. Discarded for analysis. There were multiple blastn hits, and left and right pairs could not be determined.	Partial IS hit.	-	-	-	-	SM_RS24220	hypothetical protein	SM_RS24260	branched-chain amino acid ABC transporter permease	1683333.0
D	ISRm2011-2_IS630	1818792	D	120	ISRle2_IS30	1735149	1735611.0							NC_003047.1	1730648.0	1731148.0		1739612.0	1740112.0	IS only present in ref Strain.	5. Discarded for analysis. There were multiple blastn hits, and left and right pairs could not be determined.	Partial IS hit.	-	-	-	-	SM_RS08130	MFS transporter	SM_RS08180	pyrophosphatase	3654135.0
D	ISRm5_IS256	3266801	D	121	ISRm2011-2_IS630	3357265	3358317.0							NC_003047.1	3352764.0	3353264.0		3362318.0	3362818.0	IS only present in ref Strain.	5. Discarded for analysis. There were multiple blastn hits, and left and right pairs could not be determined.		-	-	-	-	SM_RS15825	alkaline phosphatase	SM_RS15880	IS3 family transposase	3654135.0
D	ISRm2011-2_IS630	3357265	D	122	ISKpn11_IS3_IS150	3361837	3363122.0							NC_003047.1	3357336.0	3357836.0		3367123.0	3367623.0	IS only present in ref Strain.	5. Discarded for analysis. There were multiple blastn hits, and left and right pairs could not be determined.	Partial IS hit.	-	-	-	-	SM_RS15850	IS630-like element ISRm2011-2 family transposase	SM_RS15910	L-proline cis-4-hydroxylase	3654135.0
D	ISRm2011-2_IS630	1156044	D	123	ISRm2011-2_IS630	1156044	1157099.0	NC_019846.2	69792.0	69902.0				NC_003037.1	1151543.0	1152043.0		1161100.0	1161600.0	IS only present in ref Strain.	6. Discarded for analysis, blastn hits with low query coverage.		C770_RS33745	potassium transporter Kup	-	-	-	Intergenic/Pseudo/Repeaed Region	-	Contig end.	1354226.0
C	ISSme3_IS66	38114	D	124	ISSme3_IS66	38114	41262.0	NC_019847.2	33613.0	34113.0		45263.0	45763.0							IS only present in query Strain.	6. Discarded for analysis, blastn hits with low query coverage.	Partial IS hit.	C770_RS34470	response regulator transcription factor	C770_RS34530	IS256 family transposase	-	-	-	-	225725.0
D	ISPye4_IS1182	63166	D	125	ISPye4_IS1182	63166	64018.0	NC_019847.2	58665.0	59165.0		68019.0	68519.0	NC_003037.1	262822.0	263209.0				IS only present in query Strain.	6. Discarded for analysis, blastn hits with low query coverage.	Partial IS hit.	C770_RS34600	nuclear transport factor 2 family protein	C770_RS34645	cupin domain-containing protein	SM_RS26025	RepB plasmid partition	-	-	225725.0
D	ISSme1_IS407_IS3	144166	D	126	ISSme1_IS3_IS407	144166	145436.0	NC_019847.2	139665.0	140165.0		149437.0	149937.0							IS only present in query Strain.	6. Discarded for analysis, blastn hits with low query coverage.	Partial IS hit.	C770_RS35055	amidohydrolase family protein	C770_RS35095	protein nfe1	-	-	-	-	225725.0
C	ISRm4_IS1031_IS5	154461	D	127	ISRm4_IS5_IS1031	154461	155393.0	NC_019847.2	149960.0	150460.0		159394.0	159894.0							IS only present in query Strain.	6. Discarded for analysis, blastn hits with low query coverage.	Partial IS hit.	C770_RS35100	protein nfe2	C770_RS51015	DDE-type integrase/transposase/recombinase	-	-	-	-	225725.0
D	ISRm9_IS21	155546	D	128	ISRm9_IS21	155546	158343.0	NC_019847.2	151045.0	151545.0		162344.0	162844.0							IS only present in query Strain.	6. Discarded for analysis, blastn hits with low query coverage.		C770_RS35105	ornithine cyclodeaminase family protein	C770_RS35165	IS630-like element ISRm2011-2 family transposase	-	-	-	-	225725.0
D	ISRm4-1_IS1031_IS5	158344	D	129	ISRm4-1_IS5_IS1031	158344	159134.0	NC_019847.2	153843.0	154343.0		163135.0	163635.0							IS only present in query Strain.	6. Discarded for analysis, blastn hits with low query coverage.	Partial IS hit.	C770_RS35115	GntR family transcriptional regulator	C770_RS35170	IS701 family transposase	-	-	-	-	225725.0
D	ISRel16_IS21	793665	D	130	ISRel16_IS21	793665	796263.0	NC_019848.2	789164.0	789664.0		800264.0	800764.0	NC_003037.1	904704.0	904866.0				IS only present in query Strain.	6. Discarded for analysis, blastn hits with low query coverage.		C770_RS39205	LysR family transcriptional regulator	C770_RS51580	hypothetical protein	SM_RS29115	transposase	-	-	1417907.0
			D	131	ISRle2_IS30	915112	916033.0	NC_019848.2	910611.0	911111.0		920034.0	920534.0							IS only present in query Strain.	6. Discarded for analysis, blastn hits with low query coverage.	Partial IS hit.	C770_RS39795	signal transduction histidine kinase	C770_RS39850	IS66 family insertion sequence hypothetical protein	-	-	-	-	1417907.0
			D	132	ISRm31_IS701	1124147	1125562.0	NC_019848.2	1119646.0	1120146.0		1129563.0	1130063.0							IS only present in query Strain.	6. Discarded for analysis, blastn hits with low query coverage.	Partial IS hit.	C770_RS40760	DUF2721 domain-containing protein	C770_RS40800	hypothetical protein	-	-	-	-	1417907.0
			D	133	ISRle2_IS30	1157212	1158133.0	NC_019848.2	1194135.0	1194453.0				NC_003037.1	1152711.0	1153211.0		1162134.0	1162634.0	IS only present in ref Strain.	6. Discarded for analysis, blastn hits with low query coverage.	Partial IS hit.	C770_RS41045	AAA family ATPase	-	-	C770_RS40870	CBS domain-containing protein	C770_RS40900	aquaporin Z	1354226.0
D	ISRm17_ISDol1_ISNCY	1202800	D	134	ISRm17_ISNCY_ISDol1	1202800	1204450.0	NC_019848.2	1198299.0	1198799.0		1208451.0	1208951.0							IS only present in query Strain.	6. Discarded for analysis, blastn hits with low query coverage.	Partial IS hit.	C770_RS41065	NAD-dependent epimerase/dehydratase family protein	C770_RS41105	fimbrial major subunit CsuA/B family protein	-	-	-	-	1417907.0
D	ISKpn11_IS150_IS3	3361837	D	135	ISRm17_ISNCY_ISDol1	3375558	3377221.0							NC_003047.1	3371057.0	3371557.0		3381222.0	3381722.0	IS only present in ref Strain.	6. Discarded for analysis, blastn hits with low query coverage.		-	-	-	-	SM_RS15925	transposase	SM_RS15965	FAD-binding oxidoreductase	3654135.0
D	ISRm5_IS256	2377793	D	136	ISSpma2_IS256	2479757	2480308.0	NC_019845.2	2475256.0	2475756.0		2484309.0	2484809.0							IS only present in query Strain.	7. Not found by Blastn.	Partial IS hit.	C770_RS11715	hypothetical protein	-	Intergenic/Pseudo/Repeaed Region	-	-	-	-	3620713.0
D	ISSpma2_IS256	2482522	D	137	ISSpma2_IS256	2482522	2483296.0	NC_019845.2	2478021.0	2478521.0		2487297.0	2487797.0							IS only present in query Strain.	7. Not found by Blastn.	Partial IS hit.	-	Intergenic/Pseudo/Repeaed Region	C770_RS11760	ABC-type dipeptide transport system; periplasmic component	-	-	-	-	3620713.0
D	ISPpa5_IS66	2513121	D	138	ISPpa5_IS66	2513121	2515927.0	NC_019845.2	2508620.0	2509120.0		2519928.0	2520428.0							IS only present in query Strain.	7. Not found by Blastn.		C770_RS11795	SAM-dependent methyltransferase	C770_RS11860	DUF3320 domain-containing protein	-	-	-	-	3620713.0
D	ISRm5_IS256	129471	D	139	ISRm5_IS256	129471	130806.0	NC_019846.2	124970.0	125470.0		134807.0	135307.0							IS only present in query Strain.	7. Not found by Blastn.	Partial IS hit.	-	Intergenic/Pseudo/Repeaed Region	C770_RS34135	thioredoxin domain-containing protein	-	-	-	-	175983.0
D	ISEc59_IS6	28798	D	140	ISEc59_IS6	28798	29628.0	NC_019847.2	24297.0	24797.0		33629.0	34129.0							IS only present in query Strain.	7. Not found by Blastn.	Partial IS hit.	C770_RS34425	multicopper oxidase domain-containing protein	C770_RS34470	response regulator transcription factor	-	-	-	-	225725.0
D	ISRm2011-2_IS630	30091	D	141	ISRm2011-2_IS630	30091	31143.0	NC_019847.2	25590.0	26090.0		35144.0	35644.0							IS only present in query Strain.	7. Not found by Blastn.	Partial IS hit.	C770_RS34425	multicopper oxidase domain-containing protein	C770_RS34480	hypothetical protein	-	-	-	-	225725.0
D	ISRm33_IS903_IS5	47529	D	142	ISRm33_IS5_IS903	47529	48054.0	NC_019847.2	43028.0	43528.0		52055.0	52555.0							IS only present in query Strain.	7. Not found by Blastn.	Partial IS hit.	C770_RS34520	EAL domain-containing protein	C770_RS34555	1-aminocyclopropane-1-carboxylate deaminase	-	-	-	-	225725.0
D	ISRel3_IS21	48055	D	143	ISRel3_IS21	48055	50289.0	NC_019847.2	43554.0	44054.0		54290.0	54790.0							IS only present in query Strain.	7. Not found by Blastn.	Partial IS hit.	C770_RS34520	EAL domain-containing protein	C770_RS34570	IS110 family transposase	-	-	-	-	225725.0
D	ISRle5_IS407_IS3	54896	D	144	ISRle5_IS3_IS407	54896	56094.0	NC_019847.2	50395.0	50895.0		60095.0	60595.0							IS only present in query Strain.	7. Not found by Blastn.	Partial IS hit.	C770_RS50855	transposase	C770_RS34610	thioredoxin	-	-	-	-	225725.0
D	ISRtr1_IS256	64088	D	145	ISRtr1_IS256	64088	64526.0	NC_019847.2	59587.0	60087.0		68527.0	69027.0							IS only present in query Strain.	7. Not found by Blastn.	Partial IS hit.	C770_RS34605	cytochrome P450	C770_RS34645	cupin domain-containing protein	-	-	-	-	225725.0
D	ISRm9_IS21	121264	D	146	ISRm9_IS21	121264	124061.0	NC_019847.2	116763.0	117263.0		128062.0	128562.0							IS only present in query Strain.	7. Not found by Blastn.		C770_RS34925	PLP-dependent aminotransferase family protein	C770_RS34995	transporter substrate-binding domain-containing protein	-	-	-	-	225725.0
D	ISRm3G_IS256	151911	D	147	ISRm3G_IS256	151911	153208.0	NC_019847.2	147410.0	147910.0		157209.0	157709.0							IS only present in query Strain.	7. Not found by Blastn.	Partial IS hit.	C770_RS35090	IS5 family transposase	C770_RS35135	IS21-like element ISRm9 family transposase	-	-	-	-	225725.0
D	ISRm2011-2_IS630	159747	D	148	ISRm2011-2_IS630	159747	160295.0	NC_019847.2	155246.0	155746.0		164296.0	164796.0							IS only present in query Strain.	7. Not found by Blastn.	Partial IS hit.	C770_RS35120	IS5-like element ISRm4 family transposase	C770_RS35180	hypothetical protein	-	-	-	-	225725.0
D	ISRm2011-2_IS630	162180	D	149	ISRm2011-2_IS630	162180	162683.0	NC_019847.2	157679.0	158179.0		166684.0	167184.0							IS only present in query Strain.	7. Not found by Blastn.	Partial IS hit.	C770_RS35140	ATP-binding protein	C770_RS35195	HrpE/YscL family type III secretion apparatus protein	-	-	-	-	225725.0
D	ISRm31_IS701	162684	D	150	ISRm31_IS701	162684	164086.0	NC_019847.2	158183.0	158683.0		168087.0	168587.0							IS only present in query Strain.	7. Not found by Blastn.	Partial IS hit.	C770_RS35145	IS5 family transposase	C770_RS35200	FliI/YscN family ATPase	-	-	-	-	225725.0
			D	151	ISRhru5_IS5_IS427	211942	212230.0	NC_019847.2	207441.0	207941.0		216231.0	216731.0							IS only present in query Strain.	7. Not found by Blastn.	Partial IS hit.	C770_RS35390	hypothetical protein	-	Intergenic/Pseudo/Repeaed Region	-	-	-	-	225725.0
C	ISAzo26_IS91	218847	D	152	ISAzo26_IS91	218847	219723.0	NC_019847.2	214346.0	214846.0		223724.0	224224.0							IS only present in query Strain.	7. Not found by Blastn.	Partial IS hit.	C770_RS35420	replication protein C domain-containing protein	C770_RS35470	tyrosine-type recombinase/integrase	-	-	-	-	225725.0
D	ISRm17_ISDol1_ISNCY	134794	D	153	ISRm17_ISNCY_ISDol1	134794	136444.0	NC_019848.2	130293.0	130793.0		140445.0	140945.0							IS only present in query Strain.	7. Not found by Blastn.	Partial IS hit.	C770_RS36050	hypothetical protein	C770_RS36095	cupin domain-containing protein	-	-	-	-	1417907.0
D	ISRm2011-2_IS630	769484	D	154	ISRm2011-2_IS630	769484	770032.0	NC_019848.2	764983.0	765483.0		774033.0	774533.0							IS only present in query Strain.	7. Not found by Blastn.	Partial IS hit.	C770_RS39075	aldo/keto reductase family oxidoreductase	-	Intergenic/Pseudo/Repeaed Region	-	-	-	-	1417907.0
D	ISPpa5_IS66	797611	D	155	ISPpa5_IS66	797611	800417.0	NC_019848.2	793110.0	793610.0		804418.0	804918.0							IS only present in query Strain.	7. Not found by Blastn.		C770_RS53285	hypothetical protein	C770_RS39290	MipA/OmpV family protein	-	-	-	-	1417907.0
			D	156	ISRsp8_ISL3	1121148	1122272.0	NC_019848.2	1116647.0	1117147.0		1126273.0	1126773.0							IS only present in query Strain.	7. Not found by Blastn.	Partial IS hit.	-	Intergenic/Pseudo/Repeaed Region	C770_RS40790	HAMP domain-containing protein	-	-	-	-	1417907.0
D	ISPpa5_IS66	1138333	D	157	ISPpa5_IS66	1138333	1141139.0	NC_019849.2	1133832.0	1134332.0		1145140.0	1145640.0							IS only present in query Strain.	7. Not found by Blastn.		C770_RS47085	capsular polysaccharide biosynthesis protein	C770_RS47140	glycosyltransferase family 2 protein	-	-	-	-	1701381.0
D	ISRm17_ISDol1_ISNCY	258872	D	158	ISRm17_ISNCY_ISDol1	258872	260538.0							NC_003037.1	254371.0	254871.0		264539.0	265039.0	IS only present in ref Strain.	7. Not found by Blastn.		-	-	-	-	SM_RS25990	ABC transporter permease	SM_RS26035	threonine synthase	1354226.0
D	ISRm2011-2_IS630	663271	D	159	ISRm2011-2_IS630	663271	664323.0							NC_003047.1	658770.0	659270.0		668324.0	668824.0	IS only present in ref Strain.	7. Not found by Blastn.		-	-	-	-	SM_RS03005	hypothetical protein	SM_RS03045	restriction endonuclease subunit S	3654135.0
D	ISPpa5_IS66	1222655	D	160	ISPpa5_IS66	1222655	1224923.0							NC_003037.1	1218154.0	1218654.0		1228924.0	1229424.0	IS only present in ref Strain.	7. Not found by Blastn.	Partial IS hit.	-	-	-	-	SM_RS30580	formylglycine-generating enzyme family protein	SM_RS30645	FAD-binding oxidoreductase	1354226.0
D	ISRm17_ISDol1_ISNCY	3375558	D	161	ISRel16_IS21	3378252	3379159.0							NC_003047.1	3373751.0	3374251.0		3383160.0	3383660.0	IS only present in ref Strain.	7. Not found by Blastn.	Partial IS hit.	-	-	-	-	SM_RS15935	GntR family transcriptional regulator	SM_RS15985	dipeptidase	3654135.0
D	ISRel5_IS21	3395261	D	162	ISRel5_IS21	3395261	3397621.0							NC_003047.1	3390760.0	3391260.0		3401622.0	3402122.0	IS only present in ref Strain.	7. Not found by Blastn.	Partial IS hit.	-	-	-	-	SM_RS16010	recombinase family protein	SM_RS16065	trypsin-like serine protease	3654135.0
C	ISKpn11_IS150_IS3	3416663	D	163	ISKpn11_IS3_IS150	3416663	3417093.0							NC_003047.1	3412162.0	3412662.0		3421094.0	3421594.0	IS only present in ref Strain.	7. Not found by Blastn.	Partial IS hit.	-	-	-	-	SM_RS16105	hypothetical protein	SM_RS16135	DEAD/DEAH box helicase	3654135.0
C	ISAli10_IS66	173555
D	Tn5403_Tn3	188354
D	ISRm20_IS481	295057
D	ISRm20_IS481	299148
FP	ISRm3_IS256	743307
D	ISRm14_IS66	1014399
D	ISRm5_IS256	2402480
D	ISSpma2_IS256	2479757
C	ISRm3_IS256	3222835
C	ISRel16_IS21	3378252
